# Supplementary material for: Gut Microbiome and Metabolome Modulation by Maternal High-Fat Diet and Thermogenic Challenge
Source: MDPI journal article supplement (doi:10.3390/ijms23179658), 2022-08-25
Supplement: s1 [file s1]

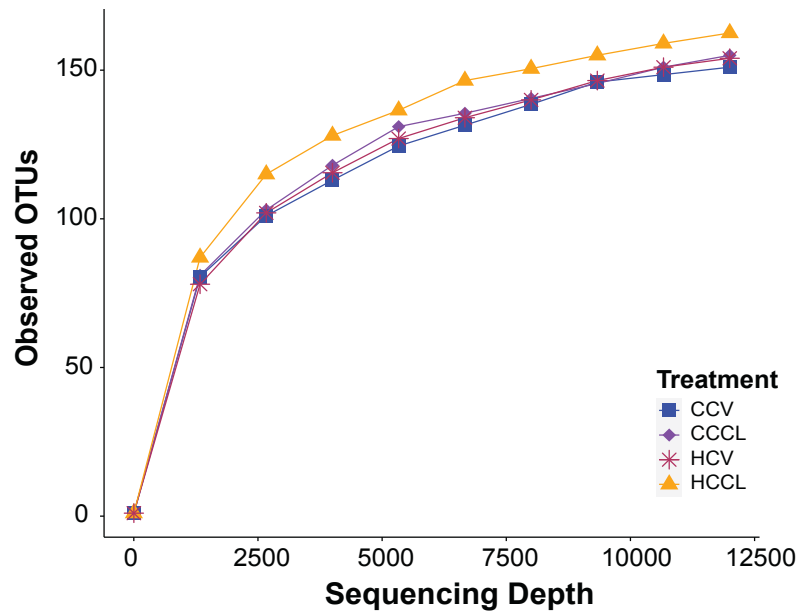

**Figure S1.** Rarefaction curves at an even sampling depth (12,000 quality-filtered reads) displaying similar bacterial community characterization across treatments. Each symbol represents the median value from 10 iterations. CCV = offspring of control diet-fed dams treated with vehicle (n = 5), CCCL = offspring of control diet-fed dams treated with CL316,243 (n = 5), HCV = offspring of high-fat diet-fed dams treated with vehicle (n = 4), HCCL = offspring of high-fat diet-fed dams treated with CL316,243 (n = 4).

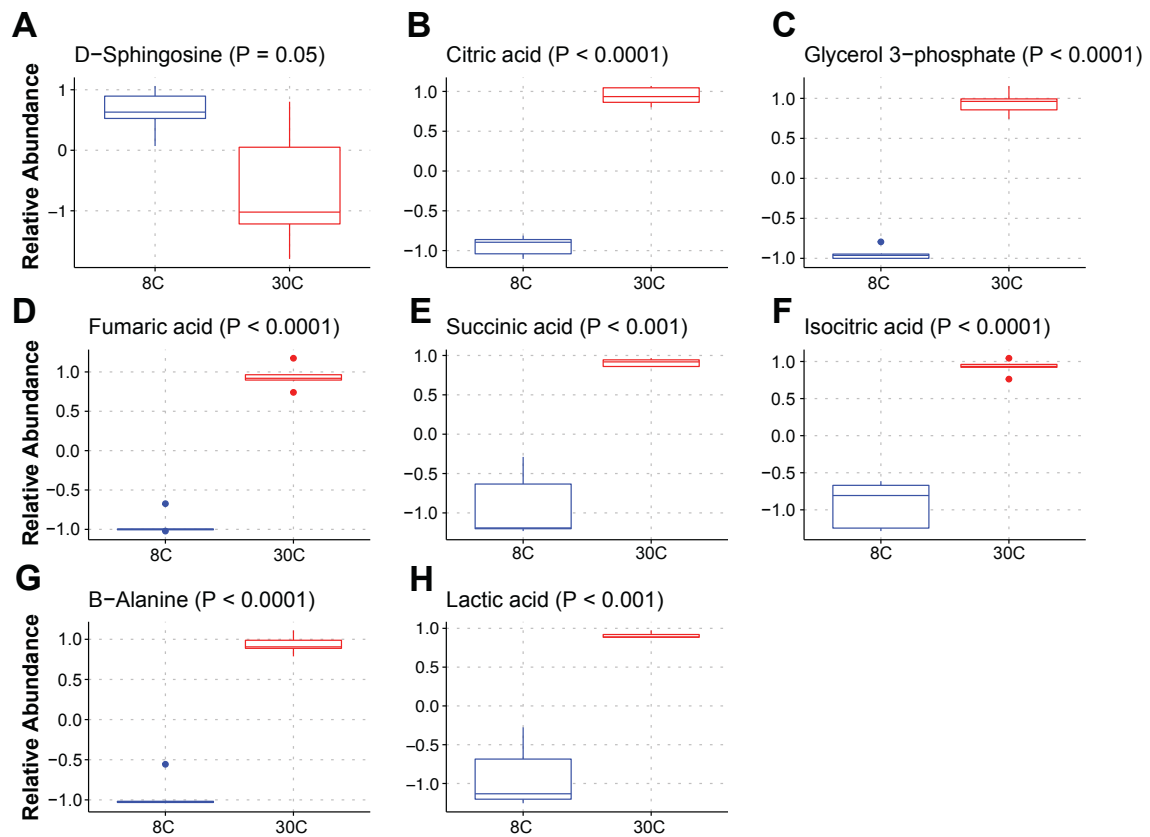

**Figure S2.** Distinct metabolite profile from identified metabolites in the (A) cecum and (B-H) serum from mice exposed to different temperatures. Student's unpaired, two-tailed t-test was used for temperature comparisons.
